# Supplementary material for: Does Exposure to More Women in Male-Dominated Fields Render Female Students More Career-Oriented?
Source: Atypon-hosted journal article supplement (doi:10.1287/mnsc.2023.01422), 2024-09-25
Supplement: mnsc.2023.01422.sm1.pdf [file mnsc.2023.01422.sm1.pdf]

## Online Appendix (For Online Publication)

### Does exposure to more women in male-dominated fields render female students more career-oriented?

Bruna Borges and Fernanda Estevan

#### O.1 Figures

Figure O.1: Career outcomes in the years after expected graduation, by gender

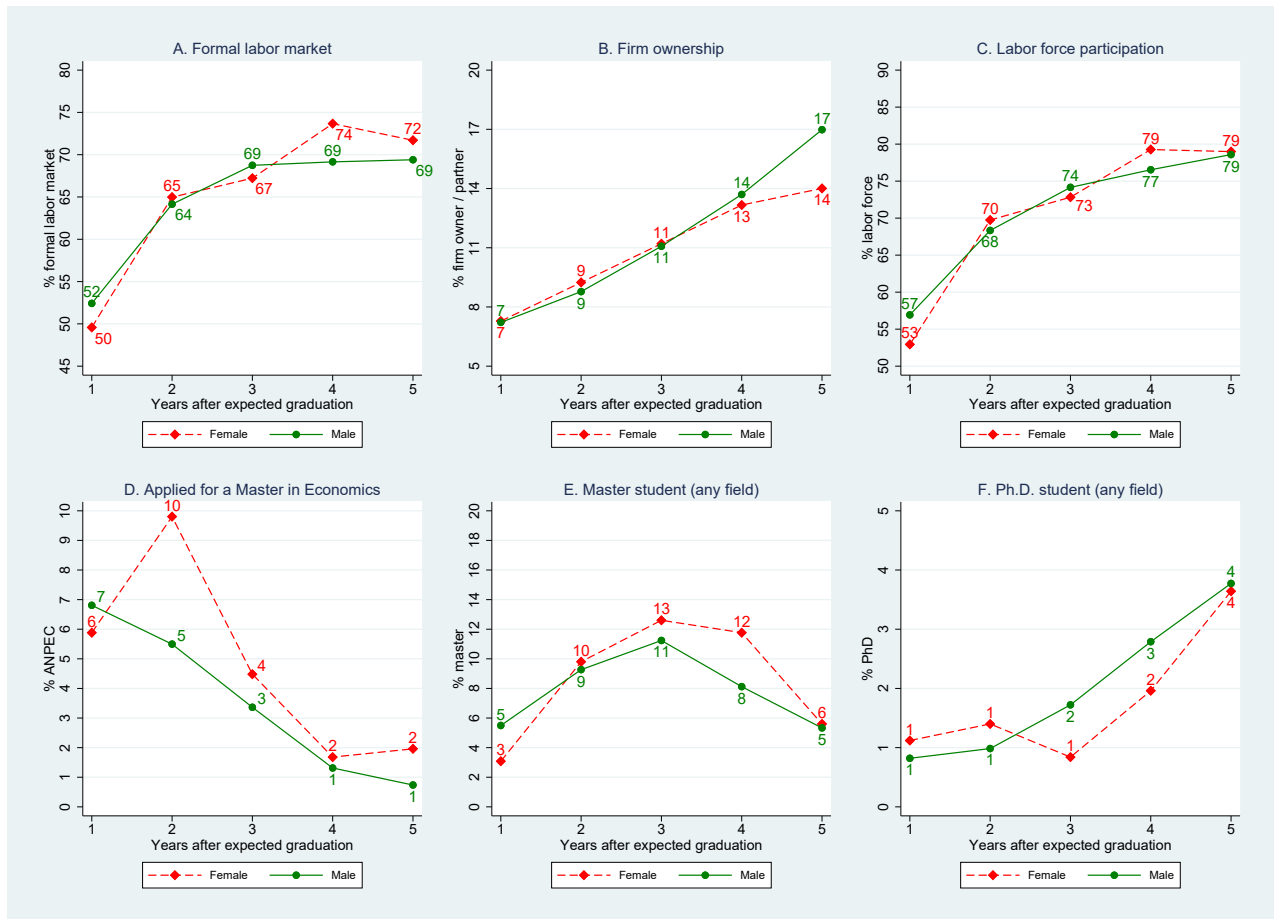

Notes: ‘Labor force participation’ combines data on formal labor market participation and firm ownership (see Section 3 for more details). We use data from RAIS for formal labor market participation, the Brazilian Revenue Service for firm ownership, the ANPEC exam for students who applied for a Master’s in Economics, and *Coordenação de Aperfeiçoamento de Pessoal de Nível Superior* (CAPES) for Master and Ph.D. students in Brazil. We complement the Ph.D. student information with web-scraped data on students enrolled in Ph.D. programs abroad collected by [Estevan and Santos \(2022\)](#).

Figure O.2: Effects of female classmates on labor force participation 5 years after expected graduation

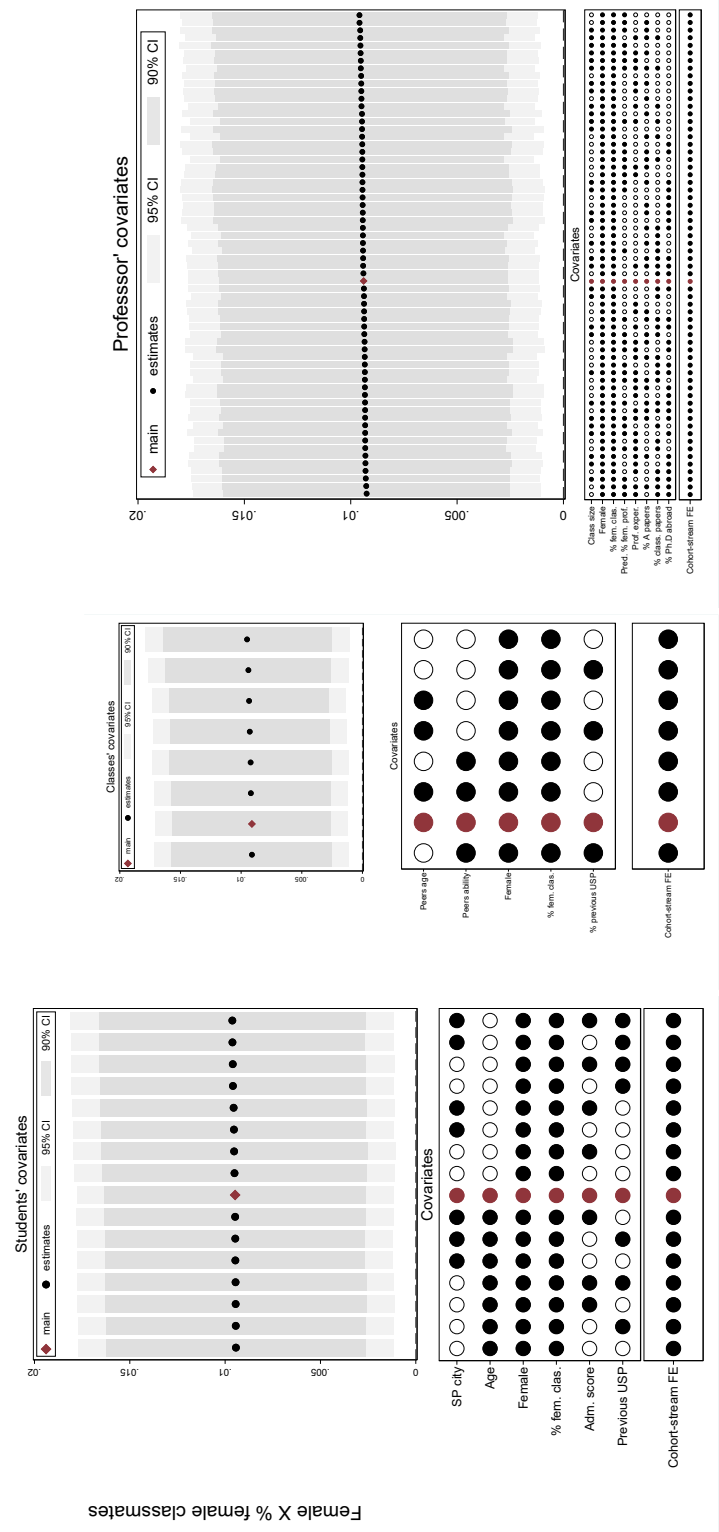

Figure O.3: Effects of female classmates on formal labor market experience

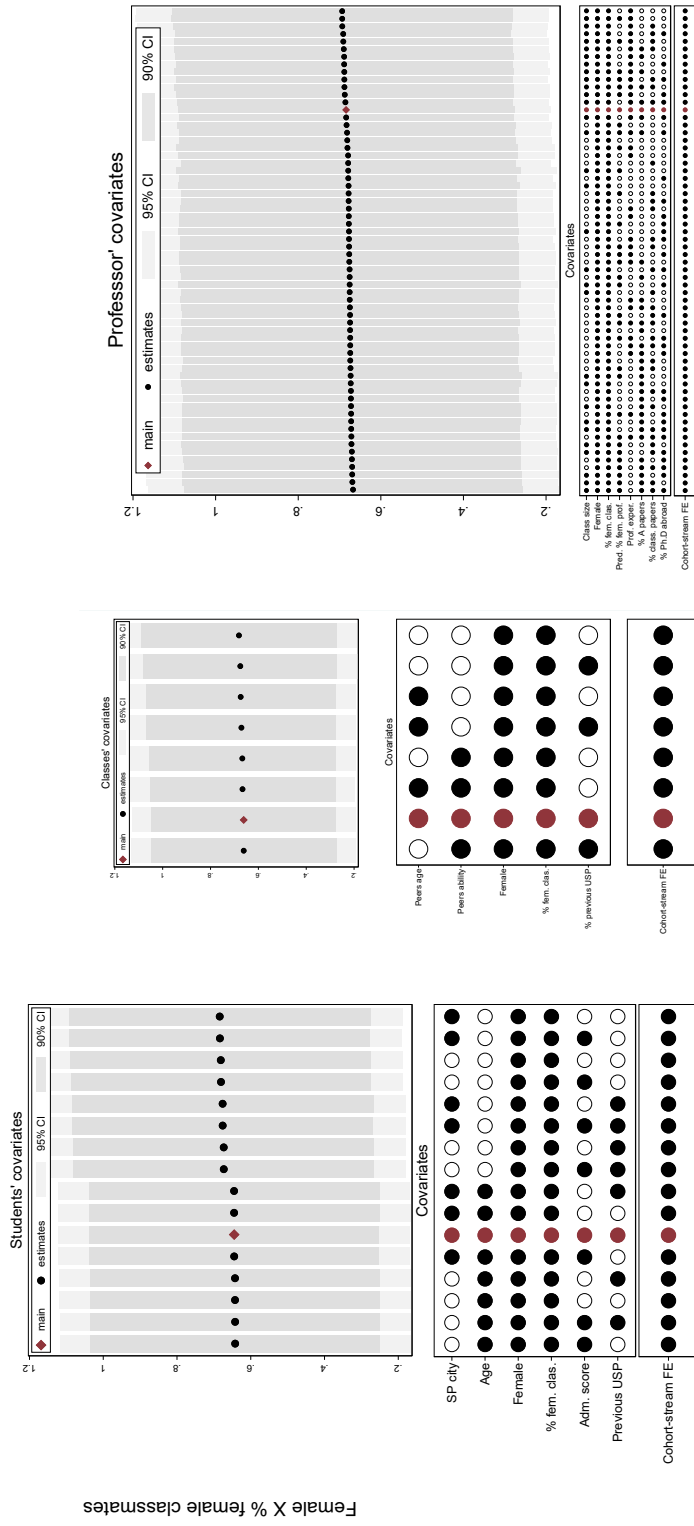

Figure O.4: Effects of female classmates on normalized maximum monthly wages

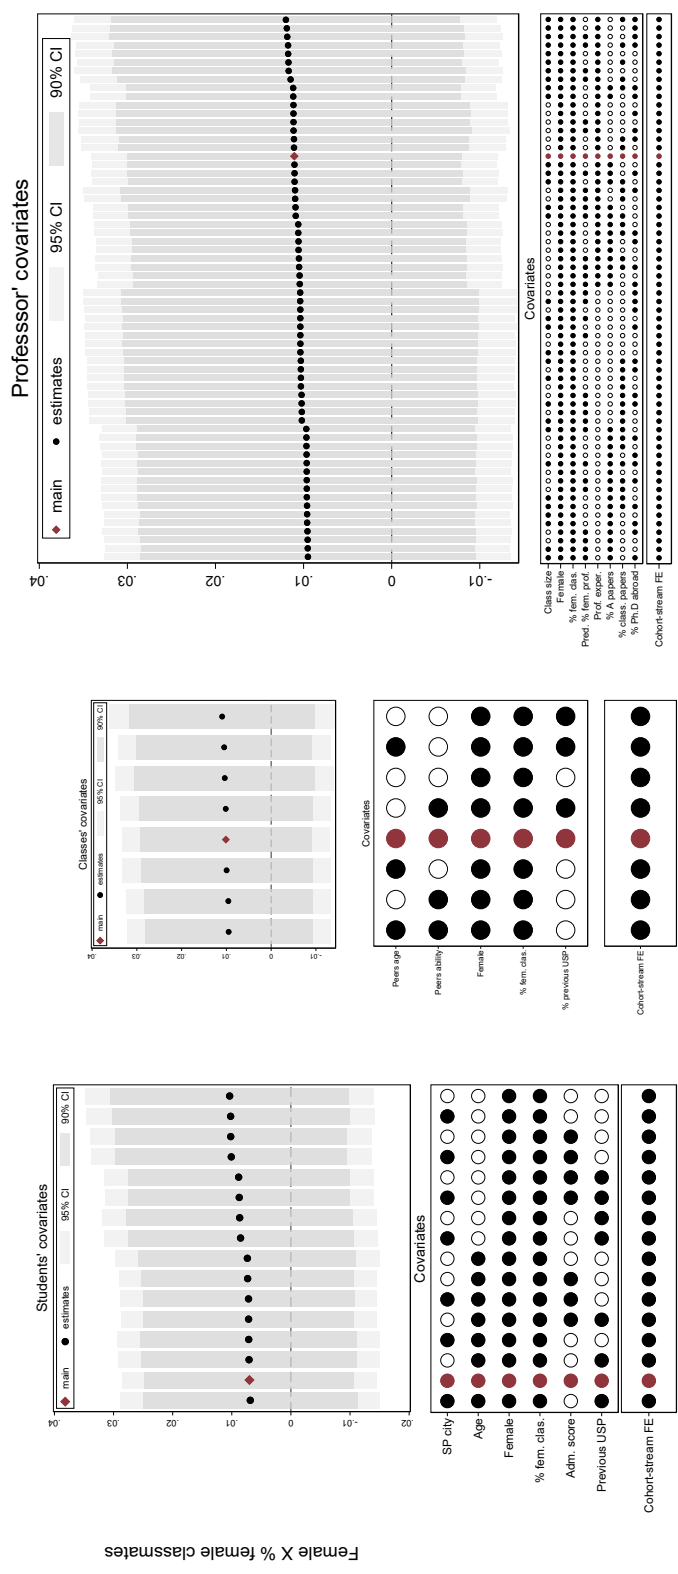

Female X % female classmates

Figure O.5: Effects of female professors on labor force participation 5 years after expected graduation

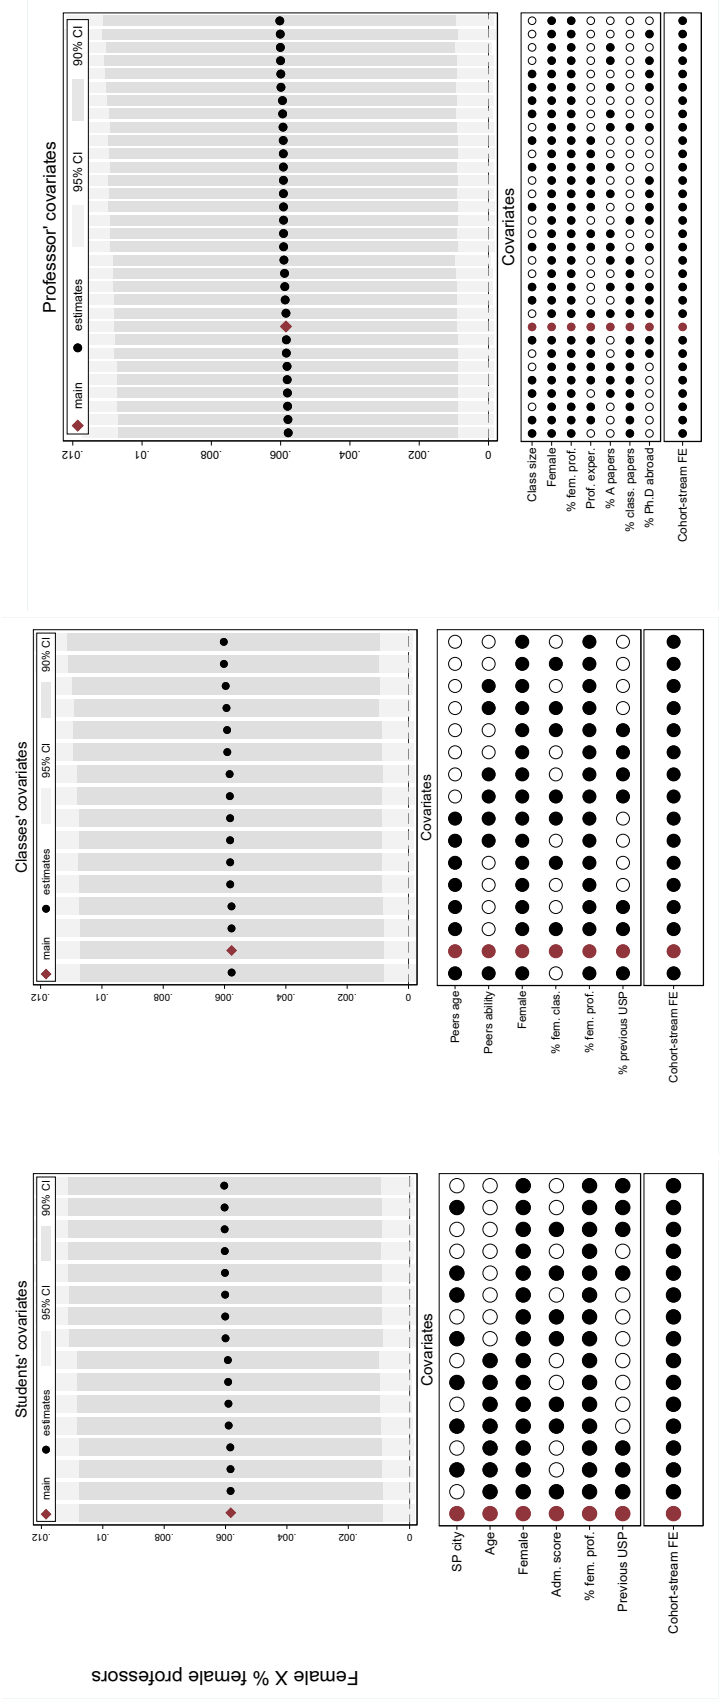

Figure O.6: Effects of female professors on formal labor market experience

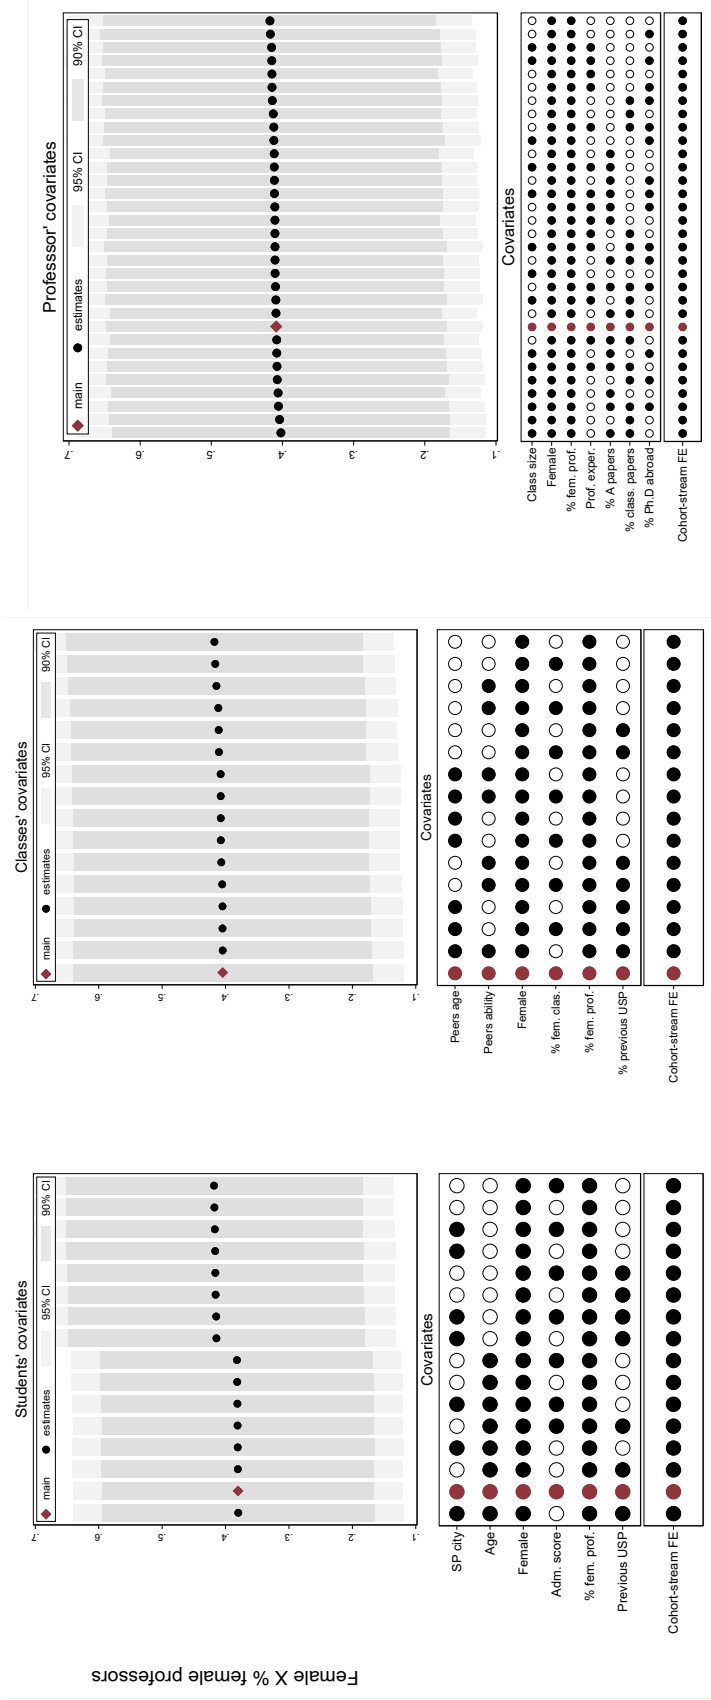

Female X % female professors

Figure O.7: Effects of female professors on normalized maximum monthly wages

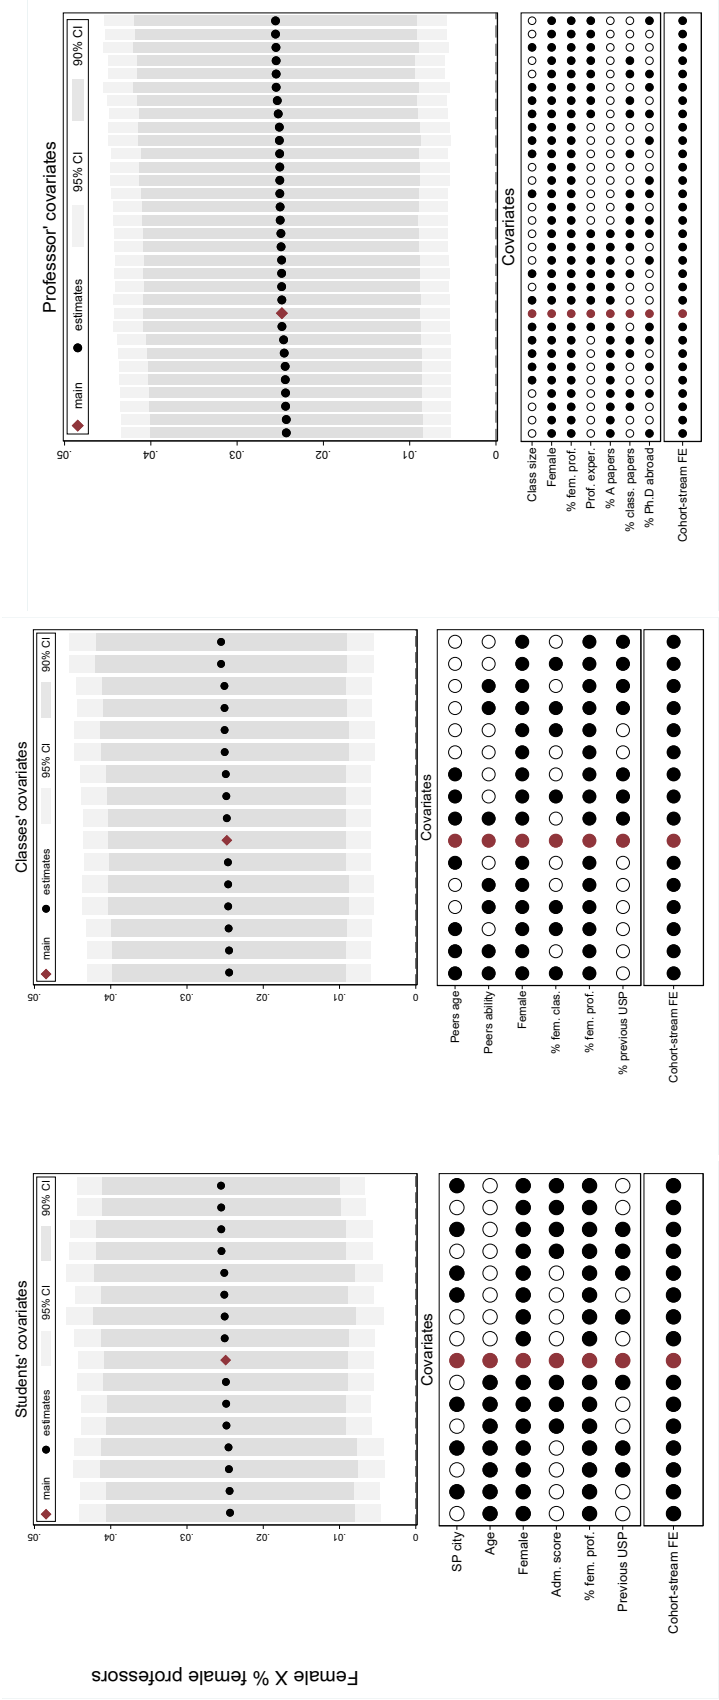

## O.2 Tables

Table O.1: Subsample of students without individual taxpayer number (CPF) at USP data

|                             | CPF             | No CPF          | Difference |
|-----------------------------|-----------------|-----------------|------------|
| Normalized admission scores | -0.38<br>(0.96) | -0.36<br>(0.98) | -0.02      |
| Age                         | 19.36<br>(3.03) | 19.38<br>(2.68) | -0.02      |
| Female                      | 0.25<br>(0.43)  | 0.21<br>(0.41)  | 0.05       |
| Daytime classes             | 0.52<br>(0.50)  | 0.59<br>(0.50)  | -0.07      |
| Previous USP enrollment     | 0.09<br>(0.28)  | 0.15<br>(0.37)  | -0.07      |
| Sao Paulo city              | 0.85<br>(0.36)  | 0.95<br>(0.22)  | -0.10*     |
| Sao Paulo state             | 0.99<br>(0.11)  | 0.97<br>(0.16)  | 0.01       |
| First admission list        | 0.80<br>(0.40)  | 0.82<br>(0.39)  | -0.02      |
| Observations                | 517             | 39              | 556        |

Notes: For the subsample of students without CPF data in the USP database, we search their CPFs by merging USP data with the labor market database using the full name and birth date. The table compares the characteristics of students we recover and does not recover the individual taxpayer information (CPF). The column "Difference" reports the coefficient of a t-test of mean differences between groups. Variables: Normalized admission scores (mean zero, standard deviation one); Student's age at admission; Female indicator; Daytime stream dummy; Previous USP enrollment; Sao Paulo city of residence dummy; Sao Paulo state of residence dummy; First USP admission list dummy. Standard deviations are in parentheses. P-values: \*  $p < 0.10$ , \*\*  $p < 0.05$ , \*\*\*  $p < 0.01$ .

Table O.2: Robustness Graduation Year: Effects of women's representation on labor market outcomes

|                                                                  | Work 1 +            | Work 2 +           | Work 5 +          | Experience           | Wage Avg.            | Wage Max.            |
|------------------------------------------------------------------|---------------------|--------------------|-------------------|----------------------|----------------------|----------------------|
| <b>Panel A: Share of female professors in compulsory courses</b> |                     |                    |                   |                      |                      |                      |
| Female × % female professors                                     | 0.006<br>(0.005)    | 0.006<br>(0.005)   | 0.004<br>(0.003)  | 0.242**<br>(0.100)   | 0.026***<br>(0.008)  | 0.033***<br>(0.008)  |
| % female professors                                              | 0.000<br>(0.003)    | -0.003<br>(0.004)  | 0.001<br>(0.002)  | -0.075<br>(0.296)    | -0.010<br>(0.006)    | -0.021***<br>(0.006) |
| Female                                                           | -0.119<br>(0.092)   | -0.082<br>(0.079)  | -0.070<br>(0.065) | -4.085*<br>(2.002)   | -0.545***<br>(0.121) | -0.687***<br>(0.112) |
| Observations                                                     | 1,189               | 1,187              | 1,112             | 1,189                | 1,055                | 1,055                |
| Wild bootstrap p-values                                          | 0.439               | 0.448              | 0.223             | 0.053                | 0.023                | 0.003                |
| <i>Summary Index Test</i>                                        |                     |                    |                   |                      |                      |                      |
| Coefficient                                                      | 0.016               |                    |                   |                      |                      |                      |
| P-value                                                          | 0.011               |                    |                   |                      |                      |                      |
| <b>Panel B: Share of female classmates</b>                       |                     |                    |                   |                      |                      |                      |
| Female × % female classmates                                     | 0.005<br>(0.004)    | 0.007**<br>(0.003) | 0.004<br>(0.002)  | 0.461**<br>(0.206)   | 0.007<br>(0.008)     | 0.009<br>(0.010)     |
| % female classmates                                              | -0.004**<br>(0.002) | -0.000<br>(0.003)  | 0.003<br>(0.002)  | -0.111<br>(0.143)    | 0.002<br>(0.006)     | -0.003<br>(0.006)    |
| Female                                                           | -0.120<br>(0.099)   | -0.132<br>(0.084)  | -0.082<br>(0.058) | -10.374**<br>(4.629) | -0.230<br>(0.191)    | -0.314<br>(0.206)    |
| Observations                                                     | 1,189               | 1,187              | 1,112             | 1,189                | 1,055                | 1,055                |
| Wild bootstrap p-values                                          | 0.299               | 0.077              | 0.083             | 0.125                | 0.433                | 0.369                |
| <i>Summary Index Test</i>                                        |                     |                    |                   |                      |                      |                      |
| Coefficient                                                      | 0.012               |                    |                   |                      |                      |                      |
| P-value                                                          | 0.052               |                    |                   |                      |                      |                      |
| Mean of dependent variable                                       | 0.75                | 0.76               | 0.81              | 40.04                | 0.00                 | 0.00                 |
| Cohort-stream fixed-effects                                      | Yes                 | Yes                | Yes               | Yes                  | Yes                  | Yes                  |
| Students' covariates                                             | Yes                 | Yes                | Yes               | Yes                  | Yes                  | Yes                  |
| Classes' covariates                                              | Yes                 | Yes                | Yes               | Yes                  | Yes                  | Yes                  |
| Professors' covariates                                           | Yes                 | Yes                | Yes               | Yes                  | Yes                  | Yes                  |

Notes: We run 2SLS regressions in Panel A and OLS regressions in Panel B. In this exercise, we restrict our sample to students that completed their degree in Economics at the University of Sao Paulo. The dependent variables are Work: labor force participation, considering formal labor market participation and firm ownership; Experience: Number of months of formal labor market experience, up to five years after actual graduation; Wages: normalized average and maximum monthly wages, considering all labor contracts. 1+, 2+, and 5+ state that the variable refers to one, two, or five years after actual graduation. The regressions include the students admitted through USP's admission exam into the Economics undergraduate degree between 2000 and 2008. Students' covariates: Normalized admission scores; Previous USP enrollment; Student's age at admission; Sao Paulo city of residence dummy. Classes' covariates: Class size; Share of female classmates; Average peers' ability (Admission scores); Share of peers with previous USP enrollment; Peers' average age. Professors' covariates: Share of female professors; Percentage with Ph.D. abroad; Experience; Share of A papers; Share of classified papers. Standard errors clustered at the cohort-stream level are in parentheses. P-values: \* p<0.10, \*\* p<0.05, \*\*\* p<0.01. We present Wild bootstrap p-values for the interaction terms (Female × % Female Professors, Female × % Female Classmates).

Table O.3: Normalized Grade Point Average (GPA): All courses

| Normalized GPA (All courses)                                     |                    |
|------------------------------------------------------------------|--------------------|
| <b>Panel A: Share of female professors in compulsory courses</b> |                    |
| Female × % female professors                                     | 0.001<br>(0.008)   |
| % female professors                                              | 0.006<br>(0.005)   |
| Female                                                           | 0.287**<br>(0.129) |
| Observations                                                     | 1,576              |
| Wild bootstrap p-values                                          | 0.834              |
| <b>Panel B: Share of female classmates</b>                       |                    |
| Female × % female classmates                                     | 0.003<br>(0.007)   |
| % female classmates                                              | 0.012**<br>(0.005) |
| Female                                                           | 0.245<br>(0.204)   |
| Observations                                                     | 1,576              |
| Wild bootstrap p-values                                          | 0.719              |
| Mean of dependent variable                                       | -0.00              |
| Std. dev. of dependent variable                                  | 1.00               |
| Cohort-stream fixed-effects                                      | Yes                |
| Students' covariates                                             | Yes                |
| Classes' covariates                                              | Yes                |
| Professors' covariates                                           | Yes                |

Notes: We run 2SLS regressions in Panel A and OLS regressions in Panel B. The dependent variable is Normalized GPA in all courses (mean zero, standard deviation one). The regressions include the students admitted through USP's admission exam into the Economics undergraduate degree between 2000 and 2008. Students' covariates: Normalized admission scores; Previous USP enrollment; Student's age at admission; Sao Paulo city of residence dummy. Classes' covariates: Class size; Share of female classmates; Average peers' ability (admission scores); Share of peers with previous USP enrollment; Peers' average age. Professors' covariates: Share of female professors; Percentage with Ph.D. abroad; Experience; Share of A papers; Share of classified papers. Standard errors clustered at the cohort-stream level are in parentheses. P-values: \* p<0.10, \*\* p<0.05, \*\*\* p<0.01. We present Wild bootstrap p-values for the interaction terms (Female × % Female Professors, Female × % Female Classmates).

Table O.4: Industries by Sector - CNAE codes

| Sector        | CNAE 2.0                                                                                                                                                                                                                                                                                                                                                                                                                                                                                                                                                                                                                                                                                                                                                                                                                                                                                                                                                                                                                                                                                                                                                                                                   | CNAE 1.0                                                                                                                                                                                                                                                                                                                                                                                                                                                                                                                                                                                                                                                                                                                                                                                                                                                                                                                                                                                                                                                                                                                                                                                                                                                                                    |
|---------------|------------------------------------------------------------------------------------------------------------------------------------------------------------------------------------------------------------------------------------------------------------------------------------------------------------------------------------------------------------------------------------------------------------------------------------------------------------------------------------------------------------------------------------------------------------------------------------------------------------------------------------------------------------------------------------------------------------------------------------------------------------------------------------------------------------------------------------------------------------------------------------------------------------------------------------------------------------------------------------------------------------------------------------------------------------------------------------------------------------------------------------------------------------------------------------------------------------|---------------------------------------------------------------------------------------------------------------------------------------------------------------------------------------------------------------------------------------------------------------------------------------------------------------------------------------------------------------------------------------------------------------------------------------------------------------------------------------------------------------------------------------------------------------------------------------------------------------------------------------------------------------------------------------------------------------------------------------------------------------------------------------------------------------------------------------------------------------------------------------------------------------------------------------------------------------------------------------------------------------------------------------------------------------------------------------------------------------------------------------------------------------------------------------------------------------------------------------------------------------------------------------------|
| Finance       | 64 Financial service activities, except insurance and pension funding<br>65 Insurance, reinsurance, and pension funding<br>66 Activities auxiliary to financial services and insurance activities                                                                                                                                                                                                                                                                                                                                                                                                                                                                                                                                                                                                                                                                                                                                                                                                                                                                                                                                                                                                          | 65 Financial intermediation<br>66 Insurance and pension funding<br>67 Activities auxiliary to financial intermediation and insurance activities                                                                                                                                                                                                                                                                                                                                                                                                                                                                                                                                                                                                                                                                                                                                                                                                                                                                                                                                                                                                                                                                                                                                             |
| Consulting    | 70 Activities of head offices; management consultancy activities                                                                                                                                                                                                                                                                                                                                                                                                                                                                                                                                                                                                                                                                                                                                                                                                                                                                                                                                                                                                                                                                                                                                           | 74.16-0 Business management advisory activities                                                                                                                                                                                                                                                                                                                                                                                                                                                                                                                                                                                                                                                                                                                                                                                                                                                                                                                                                                                                                                                                                                                                                                                                                                             |
| Public        | 84 Public administration and defense; compulsory social security                                                                                                                                                                                                                                                                                                                                                                                                                                                                                                                                                                                                                                                                                                                                                                                                                                                                                                                                                                                                                                                                                                                                           | 75 Public administration and defense; compulsory social security                                                                                                                                                                                                                                                                                                                                                                                                                                                                                                                                                                                                                                                                                                                                                                                                                                                                                                                                                                                                                                                                                                                                                                                                                            |
| Manufacturing | 10 Manufacture of food products<br>11 Manufacture of beverages<br>12 Manufacture of tobacco products<br>13 Manufacture of textiles<br>14 Manufacture of wearing apparel<br>15 Manufacture of leather and related products<br>16 Manufacture of wood products<br>17 Manufacture of paper and paper products<br>18 Printing and reproduction of recorded media<br><br>19 Manufacture of coke, refined petroleum products, and biofuels<br>20 Manufacture of chemicals and chemical products<br>21 Manufacture of basic pharmaceutical products and pharmaceutical preparations<br>22 Manufacture of rubber and plastic products<br>23 Manufacture of other non-metallic mineral products<br><br>24 Manufacture of basic metals<br>25 Manufacture of fabricated metal products, except machinery and equipment<br>26 Manufacture of computer, electronic and optical products<br>27 Manufacture of electrical equipment<br><br>28 Manufacture of machinery and equipment<br><br>29 Manufacture of motor vehicles, trailers and semi-trailers<br>30 Manufacture of other transport equipment<br>31 Manufacture of furniture<br>32 Other manufacturing<br>33 Repair and installation of machinery and equipment | 15 Manufacture of food products and beverages<br>16 Manufacture of tobacco products<br>17 Manufacture of textiles<br>18 Manufacture of wearing apparel<br>19 Manufacture of leather and related products<br>20 Manufacture of wood products<br>21 Manufacture of paper and paper products<br>22 Editing, printing, and reproduction of recorded media<br>23 Manufacture of coke and refined petroleum products, and alcohol<br>24 Manufacture of chemicals and chemical products<br><br>25 Manufacture of rubber and plastic products<br>26 Manufacture of other non-metallic mineral products<br><br>27 Manufacture of basic metals<br>28 Manufacture of fabricated metal products, except machinery and equipment<br>29 Manufacture of machinery and equipment<br>30 Manufacture of office machines and computer equipment<br>31 Manufacture of electrical equipment<br><br>32 Manufacture of electronic material and communications devices and equipment<br>33 Manufacture of medical and hospital instrumentation equipment, precision and optical instruments, equipment for industrial automation, chronometers, and clocks<br>34 Manufacture of motor vehicles, trailers and semi-trailers<br>35 Manufacture of other transport equipment<br>36 Other manufacturing<br>37 Recycling |
| Commerce      | 45 Wholesale and retail trade and repair of motor vehicles and motorcycles<br>46 Wholesale trade, except of motor vehicles and motorcycles<br>47 Retail trade, except of motor vehicles and motorcycles                                                                                                                                                                                                                                                                                                                                                                                                                                                                                                                                                                                                                                                                                                                                                                                                                                                                                                                                                                                                    | 50 Wholesale and retail trade and repair of motor vehicles and motorcycles; Fuels retail trade<br>51 Wholesale trade and trade intermediaries<br><br>52 Retail trade, except of motor vehicles and motorcycles; Repair of Personal and Household Objects                                                                                                                                                                                                                                                                                                                                                                                                                                                                                                                                                                                                                                                                                                                                                                                                                                                                                                                                                                                                                                    |
| Research      | 72 Scientific research and development<br>85.31-7 Higher education - Undergraduate program<br>85.32-5 Higher education - Undergraduate and graduate programs<br>85.33-3 Higher education - Graduate and extension programs                                                                                                                                                                                                                                                                                                                                                                                                                                                                                                                                                                                                                                                                                                                                                                                                                                                                                                                                                                                 | 73 Scientific research and development<br>80.31-4 Higher education - Undergraduate program<br>80.32-2 Higher education - Undergraduate and graduate programs<br>80.33-0 Higher education - Graduate and extension programs                                                                                                                                                                                                                                                                                                                                                                                                                                                                                                                                                                                                                                                                                                                                                                                                                                                                                                                                                                                                                                                                  |

Table O.5: Exclude 2008 cohort: Balance test, Students' characteristics

| Variable                    | Full sample       | Section 1         | Section 2         | Difference        |
|-----------------------------|-------------------|-------------------|-------------------|-------------------|
| Female                      | 0.226<br>(0.419)  | 0.207<br>(0.405)  | 0.247<br>(0.432)  | -0.034<br>(0.022) |
| Normalized admission scores | -0.095<br>(0.987) | -0.090<br>(0.999) | -0.099<br>(0.974) | 0.001<br>(0.041)  |
| Previous USP enrollment     | 0.134<br>(0.341)  | 0.141<br>(0.348)  | 0.127<br>(0.333)  | 0.009<br>(0.020)  |
| Sao Paulo city              | 0.833<br>(0.373)  | 0.836<br>(0.371)  | 0.830<br>(0.376)  | 0.011<br>(0.022)  |
| Age                         | 19.489<br>(3.166) | 19.532<br>(3.012) | 19.443<br>(3.326) | 0.055<br>(0.188)  |
| First admission list        | 0.842<br>(0.365)  | 0.849<br>(0.358)  | 0.835<br>(0.372)  | 0.016<br>(0.017)  |
| Observations                | 1,401             | 730               | 671               | 1,401             |
| Cohort-stream fixed effects | No                | No                | No                | Yes               |

Notes: The analysis includes the sample of students admitted through USP's admission exam into the Economics undergraduate degree between 2000 and 2007 (excluding the 2008 cohort). The table compares the characteristics of students assigned to Section 1, i.e., with given names belonging to the first half of the alphabet, and Section 2, i.e., with given names belonging to the second half of the alphabet. Column "Full sample" presents the average characteristics for the full sample of admitted students, column "Section 1" reports the average characteristics for students assigned to Section 1, and column "Section 2" reports the average characteristics for students assigned to Section 2. Column "Difference" reports the coefficients from separate OLS regressions of students' covariates on a Section 1 dummy, controlling for cohort-stream fixed effects. The dependent variables are the Female indicator; Normalized admission scores (mean zero, standard deviation one); Previous enrollment at USP dummy; Sao Paulo city of residence dummy; Student's age at admission; First admission list dummy. The explanatory variables are a Section 1 dummy and cohort-stream fixed effects. In columns "Full sample", "Section 1" and "Section 2," we report standard deviations in parentheses. Column "Difference" displays standard errors clustered at the cohort-stream level in parentheses. P-values: \*  $p < 0.10$ , \*\*  $p < 0.05$ , \*\*\*  $p < 0.01$ .

Table O.6: Exclude 2008 cohort: Balance test, Female classmates and professors

|                               | Female                       | Admission scores             | Previous USP enrollment      | SP city                      | Age                          | First admission list        |
|-------------------------------|------------------------------|------------------------------|------------------------------|------------------------------|------------------------------|-----------------------------|
| Predicted % female professors | 0.001<br>(0.002)<br>[0.784]  | 0.002<br>(0.003)<br>[0.422]  | -0.002<br>(0.002)<br>[0.382] | 0.003<br>(0.001)<br>[0.167]  | -0.002<br>(0.012)<br>[0.876] | 0.002<br>(0.001)<br>[0.264] |
| F Statistics                  | 0.11                         | 0.59                         | 0.83                         | 3.02                         | 0.03                         | 2.34                        |
| % female classmates           | -0.000<br>(0.000)<br>[0.354] | -0.003<br>(0.005)<br>[0.633] | -0.000<br>(0.002)<br>[0.852] | -0.002<br>(0.002)<br>[0.380] | -0.016<br>(0.024)<br>[0.665] | 0.000<br>(0.002)<br>[0.939] |
| F Statistics                  | -                            | 0.32                         | 0.04                         | 0.93                         | 0.43                         | 0.01                        |
| Mean of dependent variable    | 0.23                         | -0.09                        | 0.13                         | 0.83                         | 19.49                        | 0.84                        |
| Standard deviation            | 0.42                         | 0.99                         | 0.34                         | 0.37                         | 3.17                         | 0.36                        |
| Observations                  | 1,401                        | 1,401                        | 1,401                        | 1,401                        | 1,401                        | 1,401                       |
| Cohort-stream fixed-effects   | Yes                          | Yes                          | Yes                          | Yes                          | Yes                          | Yes                         |

Notes: The analysis includes the sample of students admitted through USP's admission exam into the Economics undergraduate degree between 2000 and 2007 (excluding the 2008 cohort). The table presents coefficients from separate OLS regressions. The dependent variables are the Female indicator; Normalized admission scores (mean zero, standard deviation one); Previous enrollment at USP dummy; Sao Paulo city of residence dummy; Student's age at admission; First admission list dummy. The key explanatory variables are the Predicted Share of female professors in compulsory courses in the first panel and the Share of female classmates in the second panel. Following [Guryan et al. \(2009\)](#), when analyzing the correlation between the share of female classmates and the gender dummy, we also control for the share of female peers in the student's admission year and stream ("Leave-me-out share of female, urn"). In this specification, we do not include the F Statistics, which is large, as we include in the regression the "Leave-me-out share of female, urn". Standard errors clustered at the cohort-stream level are in parentheses. P-values: \* p<0.10, \*\* p<0.05, \*\*\* p<0.01. In brackets, we present the Wild bootstrap p-values.

Table O.7: Robustness Exclude 2008 Cohort: Effects of women's representation on labor market outcomes

|                                                                  | Work 1 +          | Work 2 +            | Work 5 +           | Experience           | Wage Avg.          | Wage Max.           |
|------------------------------------------------------------------|-------------------|---------------------|--------------------|----------------------|--------------------|---------------------|
| <b>Panel A: Share of female professors in compulsory courses</b> |                   |                     |                    |                      |                    |                     |
| Female × % female professors                                     | 0.004<br>(0.007)  | 0.006<br>(0.006)    | 0.006*<br>(0.003)  | 0.342**<br>(0.143)   | 0.017*<br>(0.009)  | 0.024***<br>(0.008) |
| % female professors                                              | 0.001<br>(0.002)  | 0.006**<br>(0.003)  | 0.007**<br>(0.003) | 0.446**<br>(0.201)   | -0.011<br>(0.009)  | -0.018*<br>(0.009)  |
| Female                                                           | -0.061<br>(0.095) | -0.056<br>(0.097)   | -0.090<br>(0.064)  | -4.712*<br>(2.442)   | -0.284*<br>(0.158) | -0.436**<br>(0.156) |
| Observations                                                     | 1,401             | 1,401               | 1,401              | 1,401                | 1,208              | 1,208               |
| Wild bootstrap p-values                                          | 0.827             | 0.494               | 0.148              | 0.084                | 0.133              | 0.029               |
| <i>Summary Index Test</i>                                        |                   |                     |                    |                      |                    |                     |
| Coefficient                                                      | 0.012             |                     |                    |                      |                    |                     |
| P-value                                                          | 0.140             |                     |                    |                      |                    |                     |
| <b>Panel B: Share of female classmates</b>                       |                   |                     |                    |                      |                    |                     |
| Female × % female classmates                                     | -0.001<br>(0.004) | 0.015***<br>(0.005) | 0.008*<br>(0.004)  | 0.613**<br>(0.227)   | 0.000<br>(0.008)   | 0.005<br>(0.008)    |
| % female classmates                                              | 0.002<br>(0.002)  | -0.004**<br>(0.002) | 0.002<br>(0.002)   | 0.026<br>(0.092)     | 0.014**<br>(0.006) | 0.007<br>(0.006)    |
| Female                                                           | 0.031<br>(0.102)  | -0.294**<br>(0.133) | -0.166<br>(0.105)  | -12.491**<br>(5.845) | 0.014<br>(0.195)   | -0.135<br>(0.210)   |
| Observations                                                     | 1,401             | 1,401               | 1,401              | 1,401                | 1,208              | 1,208               |
| Wild bootstrap p-values                                          | 0.849             | 0.026               | 0.053              | 0.037                | 0.988              | 0.611               |
| <i>Summary Index Test</i>                                        |                   |                     |                    |                      |                    |                     |
| Coefficient                                                      | 0.013             |                     |                    |                      |                    |                     |
| P-value                                                          | 0.117             |                     |                    |                      |                    |                     |
| Mean of dependent variable                                       | 0.57              | 0.69                | 0.80               | 35.85                | 0.02               | 0.02                |
| Cohort-stream fixed-effects                                      | Yes               | Yes                 | Yes                | Yes                  | Yes                | Yes                 |
| Students' covariates                                             | Yes               | Yes                 | Yes                | Yes                  | Yes                | Yes                 |
| Classes' covariates                                              | Yes               | Yes                 | Yes                | Yes                  | Yes                | Yes                 |
| Professors' covariates                                           | Yes               | Yes                 | Yes                | Yes                  | Yes                | Yes                 |

Notes: We run 2SLS regressions in Panel A and OLS regressions in Panel B. The dependent variables are Work: labor force participation, considering formal labor market participation and firm ownership; Experience: Number of months of formal labor market experience, up to five years after expected graduation; Wages: normalized average and maximum monthly wages, considering all labor contracts. 1+, 2+, and 5+ state that the variable refers to one, two, or five years after expected graduation. The regressions include the students admitted through USP's admission exam into the Economics undergraduate degree between 2000 and 2007 (excluding 2008). Students' covariates: Normalized admission scores; Previous USP enrollment; Student's age at admission; Sao Paulo city of residence dummy. Classes' covariates: Class size; Share of female classmates; Average peers' ability (Admission scores); Share of peers with previous USP enrollment; Peers' average age. Professors' covariates: Share of female professors; Percentage with Ph.D. abroad; Experience; Share of A papers; Share of classified papers. Standard errors clustered at the cohort-stream level are in parentheses. P-values: \* p<0.10, \*\* p<0.05, \*\*\* p<0.01. We present Wild bootstrap p-values and Summary Index test statistics for the interaction terms (Female × % Female Professors, Female × % Female Classmates).

Table O.8: Testing whether students' characteristics correlate with their first names' initials

|                             | A                   | B                   | C                   | D                   | E                   | F                    | G                    | H                  | I                   | J                   | K                 |
|-----------------------------|---------------------|---------------------|---------------------|---------------------|---------------------|----------------------|----------------------|--------------------|---------------------|---------------------|-------------------|
| Female                      | 0.052***<br>(0.019) | 0.002<br>(0.012)    | 0.064***<br>(0.018) | -0.031**<br>(0.013) | -0.023**<br>(0.010) | -0.044***<br>(0.014) | -0.075***<br>(0.012) | -0.011*<br>(0.006) | -0.002<br>(0.006)   | 0.026*<br>(0.015)   | 0.011<br>(0.007)  |
| Normalized admission scores | 0.012<br>(0.008)    | -0.004<br>(0.005)   | -0.011*<br>(0.007)  | -0.009<br>(0.007)   | -0.006<br>(0.006)   | 0.003<br>(0.008)     | 0.000<br>(0.007)     | 0.006<br>(0.005)   | 0.003<br>(0.003)    | 0.012**<br>(0.006)  | -0.001<br>(0.002) |
| Previous USP enrollment     | -0.010<br>(0.026)   | -0.010<br>(0.014)   | 0.015<br>(0.020)    | 0.005<br>(0.022)    | 0.014<br>(0.019)    | 0.034<br>(0.027)     | 0.017<br>(0.022)     | 0.008<br>(0.013)   | -0.002<br>(0.008)   | -0.033**<br>(0.017) | 0.002<br>(0.008)  |
| Sao Paulo city              | -0.019<br>(0.020)   | -0.002<br>(0.014)   | -0.003<br>(0.016)   | 0.004<br>(0.017)    | 0.012<br>(0.013)    | 0.029*<br>(0.016)    | -0.006<br>(0.019)    | -0.010<br>(0.011)  | 0.006<br>(0.006)    | 0.009<br>(0.014)    | -0.001<br>(0.006) |
| Age                         | 0.005<br>(0.003)    | -0.002**<br>(0.001) | 0.001<br>(0.002)    | -0.002<br>(0.002)   | 0.001<br>(0.002)    | -0.001<br>(0.003)    | -0.005**<br>(0.002)  | 0.001<br>(0.001)   | -0.000<br>(0.001)   | 0.001<br>(0.002)    | 0.002<br>(0.001)  |
| First admission list        | 0.003<br>(0.021)    | 0.009<br>(0.015)    | 0.015<br>(0.019)    | -0.024<br>(0.022)   | 0.008<br>(0.016)    | -0.025<br>(0.021)    | 0.001<br>(0.020)     | -0.005<br>(0.010)  | -0.024**<br>(0.012) | -0.007<br>(0.017)   | 0.004<br>(0.005)  |
| Share Initial               | 0.089               | 0.041               | 0.062               | 0.068               | 0.044               | 0.077                | 0.078                | 0.018              | 0.012               | 0.054               | 0.007             |
| R-squared                   | 0.010               | 0.003               | 0.014               | 0.006               | 0.005               | 0.009                | 0.015                | 0.006              | 0.006               | 0.007               | 0.006             |
| Observations                | 1,576               | 1,576               | 1,576               | 1,576               | 1,576               | 1,576                | 1,576                | 1,576              | 1,576               | 1,576               | 1,576             |

  

|                             | L                  | M                   | N                   | O                   | P                 | R                    | S                   | T                   | V                 | W                    | Y                   |
|-----------------------------|--------------------|---------------------|---------------------|---------------------|-------------------|----------------------|---------------------|---------------------|-------------------|----------------------|---------------------|
| Female                      | 0.037**<br>(0.018) | 0.058***<br>(0.020) | 0.027***<br>(0.009) | -0.003<br>(0.004)   | -0.007<br>(0.012) | -0.075***<br>(0.016) | 0.017*<br>(0.010)   | -0.015<br>(0.012)   | 0.001<br>(0.011)  | -0.009***<br>(0.003) | 0.001<br>(0.004)    |
| Normalized admission scores | 0.006<br>(0.007)   | 0.000<br>(0.008)    | 0.000<br>(0.002)    | -0.002<br>(0.002)   | 0.007<br>(0.006)  | -0.011<br>(0.009)    | -0.004<br>(0.003)   | -0.003<br>(0.006)   | 0.006<br>(0.005)  | -0.004<br>(0.003)    | 0.000<br>(0.002)    |
| Previous USP enrollment     | 0.011<br>(0.023)   | 0.003<br>(0.027)    | -0.009*<br>(0.005)  | -0.006**<br>(0.003) | -0.011<br>(0.015) | 0.029<br>(0.026)     | -0.021**<br>(0.010) | -0.007<br>(0.016)   | -0.011<br>(0.011) | -0.015<br>(0.013)    | -0.005**<br>(0.002) |
| Sao Paulo city              | 0.004<br>(0.017)   | 0.002<br>(0.019)    | -0.002<br>(0.007)   | 0.006***<br>(0.002) | -0.015<br>(0.016) | 0.017<br>(0.021)     | -0.015<br>(0.011)   | -0.006<br>(0.015)   | -0.004<br>(0.012) | -0.002<br>(0.007)    | -0.004<br>(0.006)   |
| Age                         | -0.003<br>(0.002)  | 0.003<br>(0.003)    | 0.001<br>(0.001)    | -0.000<br>(0.000)   | 0.002<br>(0.003)  | -0.005*<br>(0.002)   | 0.002<br>(0.002)    | -0.003**<br>(0.001) | -0.001<br>(0.001) | 0.004<br>(0.002)     | -0.000<br>(0.000)   |
| First admission list        | 0.018<br>(0.018)   | 0.018<br>(0.021)    | -0.003<br>(0.009)   | 0.003<br>(0.006)    | -0.004<br>(0.016) | 0.025<br>(0.023)     | 0.003<br>(0.011)    | 0.002<br>(0.017)    | -0.013<br>(0.014) | -0.005<br>(0.009)    | 0.001<br>(0.005)    |
| Share Initial               | 0.071              | 0.091               | 0.010               | 0.005               | 0.048             | 0.113                | 0.018               | 0.049               | 0.032             | 0.008                | 0.004               |
| R-squared                   | 0.006              | 0.008               | 0.014               | 0.003               | 0.002             | 0.013                | 0.008               | 0.003               | 0.002             | 0.020                | 0.001               |
| Observations                | 1,576              | 1,576               | 1,576               | 1,576               | 1,576             | 1,576                | 1,576               | 1,576               | 1,576             | 1,576                | 1,576               |

Notes: The table presents coefficients from separate OLS regressions. The response variables are dummies for students' first names initials. The explanatory variables are the Female indicator; Normalized admission scores (mean zero, standard deviation one); Previous enrollment at USP dummy; Sao Paulo city of residence dummy; Student's age at admission; First admission list dummy. Robust standard errors are in parentheses. P-values: \* p<0.10, \*\* p<0.05, \*\*\* p<0.01.

Table O.9: Sorting regressions, First semester course sections: Share of female students

| <i>Dependent variable: Share female students</i>                   |                     |                     |                     |                     |
|--------------------------------------------------------------------|---------------------|---------------------|---------------------|---------------------|
| Female professor × female                                          | 0.001<br>(0.005)    | -0.000<br>(0.004)   | -0.002<br>(0.004)   | -0.000<br>(0.002)   |
| Female professor                                                   | -0.005<br>(0.010)   | -0.006<br>(0.010)   | -0.012<br>(0.008)   | -0.007<br>(0.007)   |
| Female                                                             | 0.018***<br>(0.003) | 0.016***<br>(0.003) | 0.011***<br>(0.002) | 0.007***<br>(0.001) |
| Mean of dependent variable                                         | 0.22                |                     |                     |                     |
| Standard deviation of dependent variable                           | 0.05                |                     |                     |                     |
| # Observations                                                     | 6,713               | 6,713               | 6,713               | 6,713               |
| # Students                                                         | 1,576               | 1,576               | 1,576               | 1,576               |
| <i>Dependent variable: Share female students (Previous cohort)</i> |                     |                     |                     |                     |
| Female professor × female                                          | 0.001<br>(0.003)    | 0.003<br>(0.003)    | 0.002<br>(0.003)    | 0.003<br>(0.002)    |
| Female professor                                                   | 0.013<br>(0.012)    | 0.006<br>(0.010)    | 0.000<br>(0.009)    | 0.004<br>(0.008)    |
| Female                                                             | 0.003<br>(0.002)    | 0.005**<br>(0.002)  | -0.001<br>(0.002)   | -0.001<br>(0.001)   |
| Mean of dependent variable                                         | 0.23                |                     |                     |                     |
| Standard deviation of dependent variable                           | 0.06                |                     |                     |                     |
| # Observations                                                     | 6,540               | 6,540               | 6,540               | 6,540               |
| # Students                                                         | 1,576               | 1,576               | 1,576               | 1,576               |
| Cohort fixed-effects                                               | No                  | Yes                 | Yes                 | No                  |
| Stream fixed-effects                                               | No                  | No                  | Yes                 | No                  |
| Cohort-stream fixed-effects                                        | No                  | No                  | No                  | Yes                 |

Notes: We estimate OLS regressions. The dependent variables are Share of female students; Share of female students in the Previous Cohort (Year), by course section. The explanatory variables are the Female indicator, the Female Professor dummy, and the interaction term of the previous variables. Standard errors clustered at the cohort-stream level are in parentheses. P-values: \* p<0.10, \*\* p<0.05, \*\*\* p<0.01.

Table O.10: Joint estimation: Effects of the share of female professors and classmates on labor market outcomes

|                                                        | Work 1 +          | Work 2 +            | Work 5 +            | Experience            | Wage Avg.          | Wage Max.          |
|--------------------------------------------------------|-------------------|---------------------|---------------------|-----------------------|--------------------|--------------------|
| Female × Predicted % female professors                 | 0.003<br>(0.005)  | 0.003<br>(0.004)    | 0.003<br>(0.002)    | 0.200*<br>(0.110)     | 0.013*<br>(0.007)  | 0.019**<br>(0.007) |
| Predicted % female professors                          | -0.003<br>(0.002) | 0.001<br>(0.002)    | 0.001<br>(0.003)    | 0.069<br>(0.172)      | -0.002<br>(0.005)  | -0.006<br>(0.005)  |
| Female × % female classmates                           | 0.001<br>(0.004)  | 0.013***<br>(0.005) | 0.008**<br>(0.004)  | 0.585**<br>(0.225)    | -0.001<br>(0.007)  | 0.004<br>(0.008)   |
| % female classmates                                    | 0.000<br>(0.002)  | -0.004**<br>(0.002) | 0.000<br>(0.003)    | -0.074<br>(0.112)     | 0.017**<br>(0.006) | 0.010<br>(0.006)   |
| Female                                                 | -0.078<br>(0.093) | -0.321**<br>(0.118) | -0.229**<br>(0.096) | -16.483***<br>(5.460) | -0.137<br>(0.207)  | -0.373<br>(0.223)  |
| Observations                                           | 1,576             | 1,576               | 1,576               | 1,576                 | 1,343              | 1,343              |
| Wild Bootstrap p-values - Female × % female professors | 0.753             | 0.678               | 0.193               | 0.180                 | 0.130              | 0.045              |
| Wild Bootstrap p-values - Female × % female classmates | 0.873             | 0.031               | 0.057               | 0.052                 | 0.885              | 0.681              |
| Mean of dependent variable                             | 0.56              | 0.69                | 0.79                | 35.26                 | 0.00               | 0.00               |
| Cohort-stream fixed-effects                            | Yes               | Yes                 | Yes                 | Yes                   | Yes                | Yes                |
| Students' covariates                                   | Yes               | Yes                 | Yes                 | Yes                   | Yes                | Yes                |
| Classes' covariates                                    | Yes               | Yes                 | Yes                 | Yes                   | Yes                | Yes                |
| Professors' covariates                                 | Yes               | Yes                 | Yes                 | Yes                   | Yes                | Yes                |

Notes: We run OLS regressions. The dependent variables are Work: labor force participation, considering formal labor market participation and firm ownership; Experience: Number of months of formal labor market experience, up to five years after expected graduation; Wages: normalized average and maximum monthly wages, considering all labor contracts, up to five years after expected graduation. 1+, 2+, and 5+ state that the variable refers to one, two, or five years after expected graduation. The regressions include the students admitted through USP's admission exam into the Economics undergraduate degree between 2000 and 2008. Students' covariates: Normalized admission scores; Previous USP enrollment; Student's age at admission; Sao Paulo city of residence dummy. Classes' covariates: Class size; Average peers' ability (Admission scores); Share of peers with previous USP enrollment; Peers' average age. Professors' covariates: Percentage with Ph.D. abroad; Experience; Share of A papers; Share of classified papers. Standard errors clustered at the cohort-stream level are in parentheses. P-values: \* p<0.10, \*\* p<0.05, \*\*\* p<0.01. We present Wild bootstrap p-values for the interaction terms (Female × % Female Professors and Female × % Female Classmates).

Table O.11: Robustness No Additional Control Variables: Effects of women's representation on labor market outcomes

|                                                                  | Work 1 +          | Work 2 +            | Work 5 +           | Experience           | Wage Avg.          | Wage Max.           |
|------------------------------------------------------------------|-------------------|---------------------|--------------------|----------------------|--------------------|---------------------|
| <b>Panel A: Share of female professors in compulsory courses</b> |                   |                     |                    |                      |                    |                     |
| Female × % female professors                                     | 0.006<br>(0.006)  | 0.007<br>(0.005)    | 0.006*<br>(0.003)  | 0.418***<br>(0.134)  | 0.017*<br>(0.009)  | 0.025**<br>(0.009)  |
| % female professors                                              | -0.003<br>(0.002) | 0.001<br>(0.001)    | -0.004*<br>(0.002) | -0.136*<br>(0.074)   | -0.004<br>(0.012)  | -0.006<br>(0.011)   |
| Female                                                           | -0.109<br>(0.089) | -0.091<br>(0.092)   | -0.099<br>(0.062)  | -7.815**<br>(2.861)  | -0.344*<br>(0.178) | -0.473**<br>(0.181) |
| Observations                                                     | 1,576             | 1,576               | 1,576              | 1,576                | 1,343              | 1,343               |
| Wild bootstrap p-values                                          | 0.635             | 0.341               | 0.103              | 0.027                | 0.103              | 0.031               |
| <i>Summary Index Test</i>                                        |                   |                     |                    |                      |                    |                     |
| Coefficient                                                      | 0.013             |                     |                    |                      |                    |                     |
| P-value                                                          | 0.081             |                     |                    |                      |                    |                     |
| <b>Panel B: Share of female classmates</b>                       |                   |                     |                    |                      |                    |                     |
| Female × % female classmates                                     | 0.003<br>(0.004)  | 0.015***<br>(0.005) | 0.010**<br>(0.004) | 0.681***<br>(0.234)  | 0.005<br>(0.011)   | 0.010<br>(0.012)    |
| % female classmates                                              | -0.002<br>(0.003) | -0.005**<br>(0.002) | -0.002<br>(0.003)  | -0.212<br>(0.125)    | 0.003<br>(0.009)   | -0.000<br>(0.009)   |
| Female                                                           | -0.079<br>(0.110) | -0.311**<br>(0.125) | -0.206*<br>(0.101) | -15.807**<br>(5.970) | -0.155<br>(0.272)  | -0.264<br>(0.278)   |
| Observations                                                     | 1,576             | 1,576               | 1,576              | 1,576                | 1,343              | 1,343               |
| Wild bootstrap p-values                                          | 0.494             | 0.026               | 0.030              | 0.035                | 0.805              | 0.512               |
| <i>Summary Index Test</i>                                        |                   |                     |                    |                      |                    |                     |
| Coefficient                                                      | 0.017             |                     |                    |                      |                    |                     |
| P-value                                                          | 0.069             |                     |                    |                      |                    |                     |
| Mean of dependent variable                                       | 0.56              | 0.69                | 0.79               | 35.26                | 0.00               | 0.00                |
| Cohort-stream fixed-effects                                      | Yes               | Yes                 | Yes                | Yes                  | Yes                | Yes                 |
| Students' covariates                                             | No                | No                  | No                 | No                   | No                 | No                  |
| Classes' covariates                                              | No                | No                  | No                 | No                   | No                 | No                  |
| Professors' covariates                                           | No                | No                  | No                 | No                   | No                 | No                  |

Notes: We run 2SLS regressions in Panel A and OLS regressions in Panel B. The dependent variables are Work: labor force participation, considering formal labor market participation and firm ownership; Experience: Number of months of formal labor market experience, up to five years after expected graduation; Wages: normalized average and maximum monthly wages, considering all labor contracts. 1+, 2+, and 5+ state that the variable refers to one, two, or five years after expected graduation. The regressions include the students admitted through USP's admission exam into the Economics undergraduate degree between 2000 and 2008. Standard errors clustered at the cohort-stream level are in parentheses. P-values: \* p<0.10, \*\* p<0.05, \*\*\* p<0.01. We present Wild bootstrap p-values and Summary Index test statistics for the interaction terms (Female × % Female Professors, Female × % Female Classmates).

Table O.12: Effects of high-performing (top 10%) female peers on labor market outcomes

|                                                                             | Work 1 +          | Work 2 +            | Work 5 +          | Experience          | Wage Avg.          | Wage Max.         |
|-----------------------------------------------------------------------------|-------------------|---------------------|-------------------|---------------------|--------------------|-------------------|
| Female $\times$ % high-performing female classmates                         | 0.003<br>(0.002)  | 0.004***<br>(0.001) | 0.002<br>(0.001)  | 0.187*<br>(0.100)   | -0.003<br>(0.004)  | -0.002<br>(0.004) |
| % high-performing female classmates                                         | 0.000<br>(0.001)  | -0.002**<br>(0.001) | -0.000<br>(0.001) | -0.034<br>(0.059)   | 0.002<br>(0.002)   | 0.001<br>(0.002)  |
| Female $\times$ % female classmates                                         | -0.002<br>(0.004) | 0.008<br>(0.005)    | 0.006<br>(0.005)  | 0.356<br>(0.289)    | 0.006<br>(0.011)   | 0.011<br>(0.013)  |
| % female classmates                                                         | 0.000<br>(0.002)  | -0.002<br>(0.002)   | 0.001<br>(0.003)  | -0.033<br>(0.111)   | 0.015**<br>(0.007) | 0.008<br>(0.007)  |
| Female                                                                      | 0.012<br>(0.091)  | -0.217*<br>(0.105)  | -0.155<br>(0.104) | -10.887*<br>(5.749) | -0.027<br>(0.207)  | -0.179<br>(0.229) |
| Observations                                                                | 1,576             | 1,576               | 1,576             | 1,576               | 1,343              | 1,343             |
| Mean of dependent variable                                                  | 0.560             | 0.687               | 0.787             | 35.264              | 0.000              | 0.000             |
| Wild bootstrap p-values Female $\times$ % Female Classmates                 | 0.604             | 0.167               | 0.274             | 0.355               | 0.647              | 0.419             |
| Wild bootstrap p-values Female $\times$ % High-performing Female Classmates | 0.184             | 0.023               | 0.099             | 0.049               | 0.474              | 0.658             |
| Cohort-stream fixed-effects                                                 | Yes               | Yes                 | Yes               | Yes                 | Yes                | Yes               |
| Students' covariates                                                        | Yes               | Yes                 | Yes               | Yes                 | Yes                | Yes               |
| Classes' covariates                                                         | Yes               | Yes                 | Yes               | Yes                 | Yes                | Yes               |
| Professors' covariates                                                      | Yes               | Yes                 | Yes               | Yes                 | Yes                | Yes               |

Notes: We run OLS regressions. We classify a student as high-performing if she ranked amongst the top 10 percent on the admission exam (by admission year). The dependent variables are Work: labor force participation, considering formal labor market participation and firm ownership; Experience: Number of months of formal labor market experience, up to five years after expected graduation; Wages: normalized average and maximum monthly wages, considering all labor contracts. 1+, 2+, and 5+ state that the variable refers to one, two, or five years after expected graduation. Students' covariates: Normalized admission scores; Previous USP enrollment; Student's age at admission; Sao Paulo city of residence dummy. Classes' covariates: Class size; Average peers' ability (Admission scores); Share of peers with previous USP enrollment; Peers' average age. Professors' covariates: Percentage with Ph.D. abroad; Experience; Share of A papers; Share of classified papers. The regressions include the students admitted through USP's admission exam into the Economics undergraduate degree between 2000 and 2008. Standard errors clustered at the cohort-stream level are in parentheses. P-values: \*  $p < 0.10$ , \*\*  $p < 0.05$ , \*\*\*  $p < 0.01$ . We present Wild bootstrap p-values for the interaction terms (Female  $\times$  % High-performing Female Classmates, Female  $\times$  % Female Classmates).

Table O.13: OLS estimates, Effects of the share of female professors on labor market outcomes

|                                                                            | Work 1 +          | Work 2 +          | Work 5 +          | Experience          | Wage Avg.         | Wage Max.           |
|----------------------------------------------------------------------------|-------------------|-------------------|-------------------|---------------------|-------------------|---------------------|
| <b>Panel A: Predicted share of female professors in compulsory courses</b> |                   |                   |                   |                     |                   |                     |
| Female × Predicted % female professors                                     | 0.004<br>(0.004)  | 0.004<br>(0.003)  | 0.004*<br>(0.002) | 0.282***<br>(0.089) | 0.012<br>(0.007)  | 0.019**<br>(0.007)  |
| Predicted % female professors                                              | -0.003<br>(0.002) | 0.001<br>(0.002)  | 0.001<br>(0.003)  | 0.060<br>(0.174)    | -0.002<br>(0.005) | -0.006<br>(0.005)   |
| Female                                                                     | -0.061<br>(0.062) | -0.050<br>(0.068) | -0.063<br>(0.044) | -4.703**<br>(2.173) | -0.164<br>(0.133) | -0.298**<br>(0.131) |
| Observations                                                               | 1,576             | 1,576             | 1,576             | 1,576               | 1,343             | 1,343               |
| Wild bootstrap p-values                                                    | 0.710             | 0.353             | 0.109             | 0.022               | 0.148             | 0.038               |
| Mean of dependent variable                                                 | 0.560             | 0.687             | 0.787             | 35.264              | 0.000             | 0.000               |
| <i>Summary Index Test</i>                                                  |                   |                   |                   |                     |                   |                     |
| Coefficient                                                                | 0.009             |                   |                   |                     |                   |                     |
| P-value                                                                    | 0.082             |                   |                   |                     |                   |                     |
| Cohort-stream fixed-effects                                                | Yes               | Yes               | Yes               | Yes                 | Yes               | Yes                 |
| Students' covariates                                                       | Yes               | Yes               | Yes               | Yes                 | Yes               | Yes                 |
| Classes' covariates                                                        | Yes               | Yes               | Yes               | Yes                 | Yes               | Yes                 |
| Professors' covariates                                                     | Yes               | Yes               | Yes               | Yes                 | Yes               | Yes                 |

Notes: We run OLS regressions. The dependent variables are Work: labor force participation, considering formal labor market participation and firm ownership; Wages: normalized average and maximum monthly wages, considering all labor contracts, up to five years after expected graduation; Experience: Number of months of formal labor market experience, up to five years after expected graduation. 1+, 2+, and 5+ state that the variable refers to one, two, or five years after expected graduation. The regressions include the students admitted through USP's admission exam into the Economics undergraduate degree between 2000 and 2008. Students' covariates: Normalized admission scores; Previous USP enrollment; Student's age at admission; Sao Paulo city of residence dummy. Classes' covariates: Female classmates; Class size; Average peers' ability (Admission scores); Share of peers with previous USP enrollment; Peers' average age. Professors' covariates: Percentage with Ph.D. abroad; Experience; Share of A papers; Share of classified papers. Standard errors clustered at the cohort-stream level are in parentheses. P-values: \* p<0.10, \*\* p<0.05, \*\*\* p<0.01. We present Wild bootstrap p-values and Summary Index test statistics for the interaction terms (Female × % Female Professors, Female × % Female Classmates).

Table O.14: Selection: Effects of women’s representation on formal labor market participation

| Formal LFP 0 to 5                                                |                   |
|------------------------------------------------------------------|-------------------|
| <b>Panel A: Share of female professors in compulsory courses</b> |                   |
| Female × % female professors                                     | 0.001<br>(0.003)  |
| % female professors                                              | -0.000<br>(0.003) |
| Female                                                           | 0.018<br>(0.058)  |
| Observations                                                     | 1,576             |
| Wild bootstrap p-values                                          | 0.845             |
| <b>Panel B: Share of female classmates</b>                       |                   |
| Female × % female classmates                                     | 0.007*<br>(0.003) |
| % female classmates                                              | -0.001<br>(0.002) |
| Female                                                           | -0.119<br>(0.085) |
| Observations                                                     | 1,576             |
| Wild bootstrap p-values                                          | 0.088             |
| Mean of dependent variable                                       | 0.852             |
| Cohort-stream fixed-effects                                      | Yes               |
| Students’ covariates                                             | Yes               |
| Classes’ covariates                                              | Yes               |
| Professors’ covariates                                           | Yes               |

Notes: We run 2SLS regressions in Panel A and OLS regressions in Panel B. The dependent variable is a dummy variable that indicates if we find information on the student in the formal labor market administrative dataset (RAIS) up to five years after expected graduation. The regressions include the students admitted through USP’s admission exam into the Economics undergraduate degree between 2000 and 2008. Students’ covariates: Normalized admission scores; Previous USP enrollment; Student’s age at admission; Sao Paulo city of residence dummy. Classes’ covariates: Class size; Share of female classmates; Average peers’ ability (admission scores); Share of peers with previous USP enrollment; Peers’ average age. Professors’ covariates: Share of female professors; Percentage with Ph.D. abroad; Experience; Share of A papers; Share of classified papers. Standard errors clustered at the cohort-stream level are in parentheses. P-values: \* p<0.10, \*\* p<0.05, \*\*\* p<0.01. We present Wild bootstrap p-values for the interaction terms (Female × % Female Professors, Female × % Female Classmates).

Table O.15: Heterogeneous effects of women's representation on labor market outcomes

|                                                                  | Work 1 +            | Work 2 +             | Work 5 +             | Experience            | Wage Avg.         | Wage Max.         |
|------------------------------------------------------------------|---------------------|----------------------|----------------------|-----------------------|-------------------|-------------------|
| <b>Panel A: Share of female professors in compulsory courses</b> |                     |                      |                      |                       |                   |                   |
| Female × % female professors × Top 25% admission                 | 0.001<br>(0.010)    | -0.003<br>(0.007)    | 0.001<br>(0.006)     | -0.153<br>(0.344)     | 0.016<br>(0.027)  | 0.017<br>(0.033)  |
| Female × % female professors × Bottom 25% admission              | -0.023**<br>(0.011) | -0.019*<br>(0.011)   | -0.009<br>(0.006)    | -1.114**<br>(0.515)   | 0.020<br>(0.029)  | 0.007<br>(0.023)  |
| Female × % female professors                                     | 0.009<br>(0.006)    | 0.009**<br>(0.004)   | 0.006*<br>(0.003)    | 0.545***<br>(0.177)   | 0.011<br>(0.011)  | 0.021*<br>(0.012) |
| % female professors × Top 25% admission                          | 0.006*<br>(0.003)   | 0.006<br>(0.004)     | 0.004<br>(0.002)     | 0.382**<br>(0.152)    | 0.004<br>(0.011)  | 0.007<br>(0.013)  |
| % female professors × Bottom 25% admission                       | 0.006<br>(0.004)    | 0.008**<br>(0.003)   | 0.015***<br>(0.003)  | 0.802***<br>(0.231)   | 0.008<br>(0.012)  | 0.014<br>(0.013)  |
| % female professors                                              | -0.007**<br>(0.003) | -0.002<br>(0.003)    | -0.003<br>(0.004)    | -0.192<br>(0.227)     | -0.007<br>(0.008) | -0.014<br>(0.009) |
| Female × Top 25% admission                                       | -0.130<br>(0.206)   | -0.002<br>(0.129)    | -0.024<br>(0.137)    | 3.631<br>(7.974)      | -0.366<br>(0.567) | -0.316<br>(0.663) |
| Female × Bottom 25% admission                                    | 0.296<br>(0.216)    | 0.166<br>(0.177)     | 0.090<br>(0.121)     | 12.365<br>(8.808)     | -0.223<br>(0.483) | 0.002<br>(0.394)  |
| Female                                                           | -0.109<br>(0.124)   | -0.080<br>(0.089)    | -0.081<br>(0.075)    | -8.091*<br>(4.079)    | -0.126<br>(0.235) | -0.352<br>(0.244) |
| Top 25% admission                                                | -0.067<br>(0.066)   | -0.041<br>(0.095)    | -0.022<br>(0.052)    | -6.118*<br>(3.000)    | 0.077<br>(0.220)  | -0.009<br>(0.293) |
| Bottom 25% admission                                             | -0.178**<br>(0.084) | -0.208***<br>(0.054) | -0.262***<br>(0.033) | -16.568***<br>(4.280) | -0.276<br>(0.218) | -0.356<br>(0.248) |
| Observations                                                     | 1,576               | 1,576                | 1,576                | 1,576                 | 1,343             | 1,343             |
| <b>Panel B: Share of female classmates</b>                       |                     |                      |                      |                       |                   |                   |
| Female × % female classmates × Top 25% admission                 | -0.003<br>(0.007)   | -0.010<br>(0.012)    | -0.015<br>(0.009)    | -0.274<br>(0.398)     | 0.002<br>(0.023)  | 0.014<br>(0.027)  |
| Female × % female classmates × Bottom 25% admission              | 0.008<br>(0.009)    | 0.010<br>(0.009)     | 0.004<br>(0.007)     | 0.637<br>(0.526)      | 0.009<br>(0.023)  | 0.008<br>(0.021)  |
| Female × % female classmates                                     | -0.001<br>(0.006)   | 0.013**<br>(0.006)   | 0.011**<br>(0.005)   | 0.467*<br>(0.264)     | -0.000<br>(0.013) | 0.003<br>(0.014)  |
| % female classmates × Top 25% admission                          | 0.004<br>(0.004)    | -0.001<br>(0.003)    | 0.001<br>(0.003)     | -0.005<br>(0.205)     | 0.001<br>(0.014)  | 0.000<br>(0.016)  |
| % female classmates × Bottom 25% admission                       | 0.004<br>(0.003)    | -0.001<br>(0.003)    | 0.001<br>(0.004)     | 0.031<br>(0.259)      | 0.011<br>(0.015)  | 0.018<br>(0.018)  |
| % female classmates                                              | -0.002<br>(0.003)   | -0.004**<br>(0.002)  | -0.000<br>(0.003)    | -0.090<br>(0.134)     | 0.013<br>(0.011)  | 0.004<br>(0.012)  |
| Female × Top 25% admission                                       | -0.040<br>(0.199)   | 0.178<br>(0.284)     | 0.361<br>(0.218)     | 7.703<br>(9.846)      | -0.070<br>(0.631) | -0.279<br>(0.688) |
| Female × Bottom 25% admission                                    | -0.259<br>(0.211)   | -0.308<br>(0.195)    | -0.096<br>(0.167)    | -16.934<br>(12.715)   | -0.163<br>(0.465) | -0.136<br>(0.397) |
| Female                                                           | 0.069<br>(0.143)    | -0.210<br>(0.138)    | -0.230*<br>(0.125)   | -9.264<br>(6.597)     | 0.072<br>(0.350)  | -0.042<br>(0.374) |
| Top 25% admission                                                | -0.051<br>(0.109)   | 0.081<br>(0.085)     | 0.035<br>(0.082)     | 1.450<br>(5.543)      | 0.133<br>(0.390)  | 0.118<br>(0.471)  |
| Bottom 25% admission                                             | -0.167*<br>(0.079)  | -0.077<br>(0.075)    | -0.039<br>(0.088)    | -4.472<br>(5.571)     | -0.342<br>(0.313) | -0.474<br>(0.376) |
| Observations                                                     | 1,576               | 1,576                | 1,576                | 1,576                 | 1,343             | 1,343             |
| Mean of dependent variable                                       | 0.56                | 0.69                 | 0.79                 | 35.26                 | 0.00              | 0.00              |
| Cohort-stream fixed-effects                                      | Yes                 | Yes                  | Yes                  | Yes                   | Yes               | Yes               |
| Students' covariates                                             | Yes                 | Yes                  | Yes                  | Yes                   | Yes               | Yes               |
| Classes' covariates                                              | Yes                 | Yes                  | Yes                  | Yes                   | Yes               | Yes               |
| Professors' covariates                                           | Yes                 | Yes                  | Yes                  | Yes                   | Yes               | Yes               |

Notes: We run 2SLS regressions in Panel A and OLS regressions in Panel B. The dependent variables are Work: labor force participation, considering formal labor market participation and firm ownership; Experience: Number of months of formal labor market experience, up to five years after expected graduation; Wages: normalized average and maximum monthly wages, considering all labor contracts. 1+, 2+, and 5+ state that the variable refers to one, two, or five years after expected graduation. Top 25% and Bottom 25% Admission are dummy variables that indicate if scores are in the top or bottom quartile of the admission-year scores, respectively. The regressions include the students admitted through USP's admission exam into the Economics undergraduate degree between 2000 and 2008. Students' covariates: Normalized admission scores; Previous USP enrollment; Student's age at admission; Sao Paulo city of residence dummy. Classes' covariates: Class size; Share of female classmates; Average peers' ability (Admission scores); Share of peers with previous USP enrollment; Peers' average age. Professors' covariates: Share of female professors; Percentage with Ph.D. abroad; Experience; Share of A papers; Share of classified papers. Standard errors clustered at the cohort-stream level are in parentheses. P-values: \* p<0.10, \*\* p<0.05, \*\*\* p<0.01. We present Wild bootstrap p-values and Summary Index test statistics for the interaction terms (Female × % Female Professors, Female × % Female Classmates).

Table O.16: Working during the undergraduate program: All cohorts

|                                                                  | Intern/Formal       |
|------------------------------------------------------------------|---------------------|
| <b>Panel A: Share of female professors in compulsory courses</b> |                     |
| Female × % female professors                                     | -0.004<br>(0.003)   |
| % female professors                                              | 0.008***<br>(0.002) |
| Female                                                           | 0.121*<br>(0.068)   |
| Observations                                                     | 1,576               |
| Wild bootstrap p-values                                          | 0.236               |
| <b>Panel B: Share of female classmates</b>                       |                     |
| Female × % female classmates                                     | 0.006*<br>(0.003)   |
| % female classmates                                              | -0.000<br>(0.002)   |
| Female                                                           | -0.083<br>(0.079)   |
| Observations                                                     | 1,576               |
| Wild bootstrap p-values                                          | 0.099               |
| Mean of dependent variable                                       | 0.82                |
| Std. dev. of dependent variable                                  | 0.38                |
| Cohort-stream fixed-effects                                      | Yes                 |
| Students' covariates                                             | Yes                 |
| Classes' covariates                                              | Yes                 |
| Professors' covariates                                           | Yes                 |

Notes: We run 2SLS regressions in Panel A and OLS regressions in Panel B. The dependent variable is Intern/Formal: dummy equal to one if the student worked as an intern or formal worker during undergraduate studies and zero otherwise. The regressions include the students admitted through USP's admission exam into the Economics undergraduate degree between 2000 and 2008. Students' covariates: Normalized admission scores; Previous USP enrollment; Student's age at admission; Sao Paulo city of residence dummy. Classes' covariates: Class size; Share of female classmates; Average peers' ability (admission scores); Share of peers with previous USP enrollment; Peers' average age. Professors' covariates: Share of female professors; Percentage with Ph.D. abroad; Experience; Share of A papers; Share of classified papers. Standard errors clustered at the cohort-stream level are in parentheses. P-values: \*  $p < 0.10$ , \*\*  $p < 0.05$ , \*\*\*  $p < 0.01$ . We present Wild bootstrap p-values for the interaction terms (Female × % Female Professors, Female × % Female Classmates).

Table O.17: Effects of women’s representation on elective course choice

|                                                                  | Microeconomics    | Macroeconomics    | Finance           | Humanities        |
|------------------------------------------------------------------|-------------------|-------------------|-------------------|-------------------|
| <b>Panel A: Share of female professors in compulsory courses</b> |                   |                   |                   |                   |
| Female × % female professors                                     | 0.000<br>(0.001)  | -0.000<br>(0.001) | -0.001<br>(0.001) | 0.001<br>(0.001)  |
| % female professors                                              | -0.000<br>(0.001) | 0.001<br>(0.001)  | 0.001<br>(0.001)  | -0.000<br>(0.002) |
| Female                                                           | 0.015<br>(0.019)  | 0.018<br>(0.013)  | 0.008<br>(0.015)  | -0.031<br>(0.025) |
| Observations                                                     | 1,576             | 1,576             | 1,576             | 1,576             |
| Wild bootstrap p-values                                          | 0.698             | 0.788             | 0.457             | 0.476             |
| <b>Panel B: Share of female classmates</b>                       |                   |                   |                   |                   |
| Female × % female classmates                                     | -0.000<br>(0.001) | 0.000<br>(0.001)  | -0.000<br>(0.001) | 0.001<br>(0.001)  |
| % female classmates                                              | -0.000<br>(0.001) | 0.000<br>(0.001)  | 0.001*<br>(0.001) | 0.001<br>(0.001)  |
| Female                                                           | 0.020<br>(0.023)  | 0.005<br>(0.027)  | -0.002<br>(0.018) | -0.030<br>(0.038) |
| Observations                                                     | 1,576             | 1,576             | 1,576             | 1,576             |
| Wild bootstrap p-values                                          | 0.907             | 0.674             | 0.898             | 0.512             |
| Mean of dependent variable                                       | 0.24              | 0.20              | 0.13              | 0.28              |
| Std. dev. of dependent variable                                  | 0.13              | 0.12              | 0.10              | 0.21              |
| Cohort-stream fixed-effects                                      | Yes               | Yes               | Yes               | Yes               |
| Students’ covariates                                             | Yes               | Yes               | Yes               | Yes               |
| Classes’ covariates                                              | Yes               | Yes               | Yes               | Yes               |
| Professors’ covariates                                           | Yes               | Yes               | Yes               | Yes               |

Notes: We run 2SLS regressions in Panel A and OLS regressions in Panel B. The dependent variables are the shares of elective courses from the Department of Economics that the student enrolled in each field: Microeconomics, Macroeconomics, Finance, and Humanities. The regressions include the students admitted through USP’s admission exam into the Economics undergraduate degree between 2000 and 2008. Students’ covariates: Normalized admission scores; Previous USP enrollment; Student’s age at admission; Sao Paulo city of residence dummy. Classes’ covariates: Class size; Share of female classmates; Average peers’ ability (admission scores); Share of peers with previous USP enrollment; Peers’ average age. Professors’ covariates: Share of female professors; Percentage with Ph.D. abroad; Experience; Share of A papers; Share of classified papers. Standard errors clustered at the cohort-stream level are in parentheses. P-values: \* p<0.10, \*\* p<0.05, \*\*\* p<0.01. We present Wild bootstrap p-values for the interaction terms (Female × % Female Professors, Female × % Female Classmates).

Table O.18: Dyadic regressions: Other outcomes

|                                                 | Same industry group | Same occupation group | Same industry group $\times$ Same occupation group |
|-------------------------------------------------|---------------------|-----------------------|----------------------------------------------------|
| Both females $\times$ Same first-semester class | 0.013<br>(0.018)    | 0.034*<br>(0.016)     | 0.004<br>(0.011)                                   |
| Both males $\times$ Same first-semester class   | 0.002<br>(0.008)    | -0.000<br>(0.010)     | 0.000<br>(0.005)                                   |
| Both females                                    | 0.053***<br>(0.017) | 0.039**<br>(0.016)    | 0.030**<br>(0.012)                                 |
| Both males                                      | -0.016<br>(0.014)   | -0.029*<br>(0.016)    | -0.010<br>(0.010)                                  |
| Same first-semester class                       | -0.007<br>(0.005)   | -0.002<br>(0.007)     | -0.003<br>(0.004)                                  |
| Observations                                    | 68,241              | 68,241                | 68,241                                             |
| Wild bootstrap p-values                         | 0.447               | 0.072                 | 0.699                                              |
| Mean of dependent variable                      | 0.349               | 0.310                 | 0.108                                              |
| Cohort-stream fixed-effects                     | Yes                 | Yes                   | Yes                                                |

Notes: The table presents coefficients from separate dyadic regressions. The regressions include the 1,576 students admitted through USP's admission exam into the Economics undergraduate degree between 2000 and 2008, totaling 68,241 *within*-cohort-stream dyads. The dependent variables are dummy variables equal to one if  $i$  and  $j$  ever worked in the same industry group, same occupation group, or the interaction of both and zero otherwise. We identify the industry and occupation group using the first two digits of CNAE/95 and the first four digits of CBO 2002, respectively. The explanatory variables are Both females: dummy equal to one if both  $i$  and  $j$  are female students; Both males: dummy equal to one if both  $i$  and  $j$  are male students; Same first-semester class: dummy equal to one if  $i$  and  $j$  were assigned to the same (first-semester) class. Standard errors clustered at the cohort-stream level are in parentheses. P-values: \*  $p < 0.10$ , \*\*  $p < 0.05$ , \*\*\*  $p < 0.01$ . We present Wild bootstrap p-values for the interaction terms (Both females  $\times$  Same first-semester class).
